# Supplementary material for: Efficacy of Lifitegrast Ophthalmic Solution, 5.0%, in Patients With Moderate to Severe Dry Eye Disease: A Post Hoc Analysis of 2 Randomized Clinical Trials
Source: PubMed Central journal article supplement — JAMA Ophthalmol. 2021 Oct 7;139(11):1200–8. doi: 10.1001/jamaophthalmol.2021.3943 (PMC8498931; doi:10.1001/jamaophthalmol.2021.3943), 2021-10-07
Supplement: jamaophthalmol-e213943-s006.pdf [file jamaophthalmol-e213943-s006.pdf]

## Data Sharing Statement

Holland. Efficacy of Lifitegrast Ophthalmic Solution, 5.0%, in Patients With Moderate-to-Severe Dry Eye Disease. *JAMA Ophthalmol*. Published October 07, 2021.  
doi:10.1001/jamaophthalmol.2021.3943

### Data

**Data available:** No
